# Supplementary material for: Selexipag for the treatment of connective tissue disease-associated pulmonary arterial hypertension
Source: PubMed Central journal article supplement — Eur Respir J. 2017 Aug 17;50(2):1602493. doi: 10.1183/13993003.02493-2016 (PMC5593379; doi:10.1183/13993003.02493-2016), 2017-08-17
Supplement: ERJ-02493-2016_Table_S2.pdf [file ERJ-02493-2016_Table_S2.pdf]

**Supplementary Table S2** Events related to pulmonary arterial hypertension and death

|                                                                                                   | PAH-CTD                       |                    | PAH-SSc                       |                   | PAH-SLE                       |                   | PAH-MCTD/CTD-other            |                   |
|---------------------------------------------------------------------------------------------------|-------------------------------|--------------------|-------------------------------|-------------------|-------------------------------|-------------------|-------------------------------|-------------------|
|                                                                                                   | Placebo<br>N=167              | Selexipag<br>N=167 | Placebo<br>N=93               | Selexipag<br>N=77 | Placebo<br>N=37               | Selexipag<br>N=45 | Placebo<br>N=37               | Selexipag<br>N=45 |
| <b>Primary composite endpoint of morbidity/mortality up to the end of treatment</b>               | <i>Number of patients (%)</i> |                    | <i>Number of patients (%)</i> |                   | <i>Number of patients (%)</i> |                   | <i>Number of patients (%)</i> |                   |
| All events                                                                                        | 73 (43.7)                     | 48 (28.7)          | 46 (49.5)                     | 25 (32.5)         | 13 (35.1)                     | 11 (24.4)         | 14 (37.8)                     | 12 (26.7)         |
| Hospitalisation for worsening of PAH                                                              | 36 (21.6)                     | 21 (12.6)          | 22 (23.7)                     | 10 (13.0)         | 4 (10.8)                      | 4 (8.9)           | 10 (27.0)                     | 7 (15.6)          |
| Disease progression                                                                               | 29 (17.4)                     | 11 (6.6)           | 18 (19.4)                     | 8 (10.4)          | 8 (21.6)                      | 3 (6.7)           | 3 (8.1)                       | 0                 |
| Death from any cause                                                                              | 3 (1.8)                       | 12 (7.2)           | 1 (1.1)                       | 4 (5.2)           | 1 (2.7)                       | 3 (6.7)           | 1 (2.7)                       | 5 (11.1)          |
| Initiation of parenteral prostanoid therapy or long-term O <sub>2</sub> therapy for worsening PAH | 5 (3.0)                       | 3 (1.8)            | 5 (5.4)                       | 2 (2.6)           | 0                             | 1 (2.2)           | 0                             | 0                 |
| Need for lung transplantation or BAS for worsening of PAH                                         | 0                             | 1 (0.6)            | 0                             | 1 (1.3)           | 0                             | 0                 | 0                             | 0                 |
| <b>Secondary endpoint of all-cause death up to the end of the study</b>                           | <i>Number of patients (%)</i> |                    | <i>Number of patients (%)</i> |                   | <i>Number of patients (%)</i> |                   | <i>Number of patients (%)</i> |                   |
| Death from any cause                                                                              | 34 (20.4)                     | 33 (19.8)          | 22 (23.7)                     | 17 (22.1)         | 7 (18.9)                      | 4 (8.9)           | 5 (13.5)                      | 12 (26.7)         |

BAS: balloon atrial septostomy; CTD: connective tissue disease; MCTD: mixed connective tissue disease; PAH: pulmonary arterial hypertension; SLE: systemic lupus erythematosus; SSc: systemic sclerosis.
