# Supplementary material for: Selexipag for the treatment of connective tissue disease-associated pulmonary arterial hypertension
Source: PubMed Central journal article supplement — Eur Respir J. 2017 Aug 17;50(2):1602493. doi: 10.1183/13993003.02493-2016 (PMC5593379; doi:10.1183/13993003.02493-2016), 2017-08-17
Supplement: ERJ-02493-2016_Table_S4.pdf [file ERJ-02493-2016_Table_S4.pdf]

**Supplementary Table S4** Cause of death for all deaths up to end of study in patients with PAH-CTD

|                                                      | <b>Placebo<br/>N=167</b> | <b>Selexipag<br/>N=167</b> |
|------------------------------------------------------|--------------------------|----------------------------|
| <b>Death from any cause n (%)</b>                    | <b>34 (20.4)</b>         | <b>33 (19.8)</b>           |
| Missing cause of death n (%)*                        | 1 (2.9)                  | 0                          |
| <b>Causes of death n (%)*†</b>                       |                          |                            |
| Disease progression, PAH                             | 11 (32.4)                | 9 (27.3)                   |
| Right heart failure                                  | 3 (8.8)                  | 4 (12.1)                   |
| PAH                                                  | 2 (5.9)                  | 1 (3.0)                    |
| Acute right ventricular failure                      | 1 (2.9)                  | 1 (3.0)                    |
| Anaemia, heart failure                               | 1 (2.9)                  | 0                          |
| Cardiac arrest                                       | 1 (2.9)                  | 1 (3.0)                    |
| Cardiac failure congestive, disease progression, PAH | 1 (2.9)                  | 0                          |
| Disease progression, right heart failure             | 1 (2.9)                  | 0                          |
| Disease progression, systemic sclerosis              | 1 (2.9)                  | 0                          |
| Intestinal ischaemia, sepsis                         | 1 (2.9)                  | 0                          |
| Left cardiac failure                                 | 1 (2.9)                  | 0                          |
| Lung neoplasm                                        | 1 (2.9)                  | 0                          |
| Motor vehicle accident                               | 1 (2.9)                  | 0                          |
| Other‡                                               | 1 (2.9)                  | 0                          |
| Pneumonia bacterial, sepsis                          | 1 (2.9)                  | 0                          |
| Pulmonary embolism                                   | 1 (2.9)                  | 0                          |
| Pulmonary hypertension                               | 1 (2.9)                  | 0                          |
| Respiratory insufficiency                            | 1 (2.9)                  | 0                          |
| Septic shock                                         | 1 (2.9)                  | 0                          |
| Unknown cause of death                               | 1 (2.9)                  | 0                          |
| Acute renal failure                                  | 0                        | 1 (3.0)                    |
| Acute respiratory failure                            | 0                        | 1 (3.0)                    |
| Bradycardia, hypoglycaemia, hypotension              | 0                        | 1 (3.0)                    |
| Calculous cholecystitis                              | 0                        | 1 (3.0)                    |
| Cardiopulmonary failure, disease progression, PAH    | 0                        | 1 (3.0)                    |
| Cardiopulmonary insufficiency                        | 0                        | 1 (3.0)                    |
| Deep vein thrombosis                                 | 0                        | 1 (3.0)                    |
| DIC, sepsis, upper gastrointestinal bleeding         | 0                        | 1 (3.0)                    |
| Kidney biopsy, post biopsy bleeding                  | 0                        | 1 (3.0)                    |
| Metastatic colorectal cancer                         | 0                        | 1 (3.0)                    |
| Pneumonia                                            | 0                        | 1 (3.0)                    |
| Post procedural sepsis                               | 0                        | 1 (3.0)                    |
| PAH, systemic sclerosis                              | 0                        | 1 (3.0)                    |
| Pulmonary embolism, pulmonary oedema                 | 0                        | 1 (3.0)                    |
| Sudden death                                         | 0                        | 1 (3.0)                    |
| Sudden death, cause unknown                          | 0                        | 1 (3.0)                    |
| Ventilator associated pneumonia                      | 0                        | 1 (3.0)                    |

\*Cause of death as a percentage of all deaths in each treatment group; †ordered by frequency in the placebo arm; ‡cause of death is not provided to maintain patient confidentiality. CTD: connective tissue disease; DIC: disseminated intravascular coagulation; PAH: pulmonary arterial hypertension
