# Supplementary material for: Selexipag for the treatment of connective tissue disease-associated pulmonary arterial hypertension
Source: PubMed Central journal article supplement — Eur Respir J. 2017 Aug 17;50(2):1602493. doi: 10.1183/13993003.02493-2016 (PMC5593379; doi:10.1183/13993003.02493-2016), 2017-08-17
Supplement: ERJ-02493-2016_Table_S6.pdf [file ERJ-02493-2016_Table_S6.pdf]

**Supplementary Table S6** Change in N-terminal pro-brain natriuretic peptide from baseline to Week 26

|                                | Placebo           |                              |                              |                         | Selexipag         |                              |                              |                          | Treatment effect (95% CI)** |
|--------------------------------|-------------------|------------------------------|------------------------------|-------------------------|-------------------|------------------------------|------------------------------|--------------------------|-----------------------------|
|                                | n/N (%)           | Median at baseline* (Q1, Q3) | Median at 26 weeks* (Q1, Q3) | Median change* (Q1, Q3) | n/N (%)           | Median at baseline* (Q1, Q3) | Median at 26 weeks* (Q1, Q3) | Median change* (Q1, Q3)  |                             |
| <b>PAH-CTD</b>                 | 119/167<br>(71.3) | 480.0<br>(142.0, 1674.0)     | 423.0<br>(132.0, 1784.0)     | 13.0<br>(-99.0, 404.0)  | 128/167<br>(76.6) | 557.0<br>(161.0, 1637.5)     | 347.5<br>(109.0, 1447.5)     | -55.5<br>(-282.5, 48.0)  | -140.0<br>(-265, -51)       |
| <b>PAH-SSc</b>                 | 63/93<br>(67.7)   | 749.0<br>(270.0, 2043.0)     | 944.0<br>(232.0, 2716.0)     | 23.0<br>(-117.0, 582.0) | 56/77<br>(72.7)   | 689.0<br>(203.5, 1733.0)     | 504.5<br>(173.0, 1724.0)     | -25.5<br>(-249.5, 73.5)  | -177.5<br>(-424, -31)       |
| <b>PAH-SLE</b>                 | 28/37<br>(75.7)   | 198.0<br>(91.5, 932.0)       | 161.0<br>(64.5, 682.5)       | -36.5<br>(-93.5, 93.0)  | 37/45<br>(82.2)   | 335.0<br>(125.0, 1055.0)     | 207.0<br>(80.0, 583.0)       | -63.0<br>(-380.0, -15.0) | -64.5<br>(-280, 20)         |
| <b>PAH-MCTD/<br/>CTD-other</b> | 28/37<br>(75.7)   | 193.0<br>(85.5, 2142.5)      | 233.5<br>(48.0, 1694.0)      | 14.0<br>(-75.5, 440.5)  | 35/45<br>(77.8)   | 546.0<br>(165.0, 2059.0)     | 280.0<br>(125.0, 1621.0)     | -38.0<br>(-305.0, 57.0)  | -145.5<br>(-478, 14)        |

\*Values in ng per litre.

\*\*Point estimate for location shift as estimated by Hodges-Lehmann method.

Only patients with a non-missing value at both the baseline and at the visit are included.

CTD: connective tissue disease; MCTD: mixed connective tissue disease; N: number of patients in the population; n: number of patients with a value; PAH: pulmonary arterial hypertension; SLE: systemic lupus erythematosus; SSc: systemic sclerosis.
