# Supplementary material for: Selexipag for the treatment of connective tissue disease-associated pulmonary arterial hypertension
Source: PubMed Central journal article supplement — Eur Respir J. 2017 Aug 17;50(2):1602493. doi: 10.1183/13993003.02493-2016 (PMC5593379; doi:10.1183/13993003.02493-2016), 2017-08-17
Supplement: ERJ-02493-2016_Table_S7.pdf [file ERJ-02493-2016_Table_S7.pdf]

**Supplementary Table S7** Most frequent adverse events in patients with PAH-SSc, PAH-SLE or PAH-MCTD/-CTD-other

| Variable                                                                   | PAH-SSc          |                   | PAH-SLE         |                   | PAH-MCT/CTD-other |                   |
|----------------------------------------------------------------------------|------------------|-------------------|-----------------|-------------------|-------------------|-------------------|
|                                                                            | Placebo<br>N=91* | Selexipag<br>N=77 | Placebo<br>N=37 | Selexipag<br>N=45 | Placebo<br>N=37   | Selexipag<br>N=45 |
| Adverse events n                                                           | 694              | 708               | 298             | 336               | 309               | 455               |
| Patients with ≥1 adverse event n (%)                                       | 88 (96.7)        | 76 (98.7)         | 37 (100)        | 44 (97.8)         | 35 (94.6)         | 44 (97.8)         |
| Patients with ≥1 serious adverse event n (%)                               | 48 (52.7)        | 36 (46.8)         | 15 (40.5)       | 18 (40.0)         | 22 (59.5)         | 26 (57.8)         |
| Patients with adverse event leading to discontinuation of study drug n (%) | 12 (13.2)        | 15 (19.5)         | 2 (5.4)         | 7 (15.6)          | 1 (2.7)           | 10 (22.2)         |
| Adverse event** n (%)                                                      |                  |                   |                 |                   |                   |                   |
| Headache                                                                   | 31 (34.1)        | 42 (54.5)         | 11 (29.7)       | 33 (73.3)         | 18 (48.6)         | 29 (64.4)         |
| Diarrhoea                                                                  | 25 (27.5)        | 35 (45.5)         | 11 (29.7)       | 16 (35.6)         | 6 (16.2)          | 16 (35.6)         |
| Nausea                                                                     | 24 (26.4)        | 24 (31.2)         | 8 (21.6)        | 20 (44.4)         | 9 (24.3)          | 18 (40.0)         |
| Worsening of PAH                                                           | 40 (44.0)        | 21 (27.3)         | 9 (24.3)        | 9 (20.0)          | 13 (35.1)         | 9 (20.0)          |
| Dizziness                                                                  | 16 (17.6)        | 17 (22.1)         | 8 (21.6)        | 9 (20.0)          | 6 (16.2)          | 9 (20.0)          |
| Pain in extremity                                                          | 4 (4.4)          | 17 (22.1)         | 2 (5.4)         | 5 (11.1)          | 2 (5.4)           | 9 (20.0)          |
| Pain in jaw                                                                | 7 (7.7)          | 15 (19.5)         | 1 (2.7)         | 6 (13.3)          | -                 | -                 |
| Peripheral oedema                                                          | 19 (20.9)        | 14 (18.2)         | 7 (18.9)        | 9 (20.0)          | 5 (13.5)          | 9 (20.0)          |
| Dyspnoea                                                                   | 19 (20.9)        | 13 (16.9)         | 11 (29.7)       | 7 (15.6)          | 7 (18.9)          | 10 (22.2)         |
| Upper respiratory tract infection                                          | 12 (13.2)        | 12 (15.6)         | 11 (29.7)       | 13 (28.9)         | 8 (21.6)          | 8 (17.8)          |
| Back pain                                                                  | 6 (6.6)          | 11 (14.3)         | 4 (10.8)        | 3 (6.7)           | -                 | -                 |
| Anaemia                                                                    | 12 (13.2)        | 10 (13.0)         | -               | -                 | 3 (8.1)           | 5 (11.1)          |
| Increased NT-proBNP                                                        | 13 (14.3)        | 9 (11.7)          | -               | -                 | -                 | -                 |
| Myalgia                                                                    | 7 (7.7)          | 9 (11.7)          | 3 (8.1)         | 6 (13.3)          | -                 | 6 (13.3)          |
| Right ventricular failure                                                  | 11 (12.1)        | 8 (10.4)          | -               | -                 | -                 | -                 |
| Pneumonia                                                                  | 8 (8.8)          | 8 (10.4)          | -               | -                 | -                 | -                 |

|                              |         |          |          |           |          |           |
|------------------------------|---------|----------|----------|-----------|----------|-----------|
| Nasopharyngitis              | 7 (7.7) | 8 (10.4) | 4 (10.8) | 6 (13.3)  | 1 (2.7)  | 5 (11.1)  |
| Urinary tract infection      | 6 (6.6) | 8 (10.4) | 4 (10.8) | 2 (4.4)   | -        | -         |
| Asthenia                     | 4 (4.4) | 8 (10.4) | -        | -         | -        | -         |
| Vomiting                     | -       | -        | 6 (16.2) | 16 (35.6) | 1 (2.7)  | 13 (28.9) |
| Cough                        | -       | -        | 6 (16.2) | 6 (13.3)  | 9 (24.3) | 4 (8.9)   |
| Flushing                     | -       | -        | 4 (10.8) | 7 (15.6)  | -        | 7 (15.6)  |
| Insomnia                     | -       | -        | 7 (18.9) | 3 (6.7)   | -        | -         |
| Chest pain                   | -       | -        | 4 (10.8) | 4 (8.9)   | 6 (16.2) | 9 (20.0)  |
| Systemic lupus erythematosus | -       | -        | 4 (10.8) | 4 (8.9)   | -        | -         |
| Abdominal pain               | -       | -        | 1 (2.7)  | 6 (13.3)  | -        | -         |
| Decreased appetite           | -       | -        | 4 (10.8) | 3 (6.7)   | 4 (10.8) | 8 (17.8)  |
| Pyrexia                      | -       | -        | 1 (2.7)  | 6 (13.3)  | 5 (13.5) | 2 (4.4)   |
| Constipation                 | -       | -        | 5 (13.5) | 1 (2.2)   | -        | -         |
| Cellulitis                   | -       | -        | 5 (13.5) | -         | -        | -         |
| Epistaxis                    | -       | -        | 4 (10.8) | 1 (2.2)   | -        | -         |
| Leukopenia                   | -       | -        | 4 (10.8) | 1 (2.2)   | -        | -         |
| Abdominal distension         | -       | -        | 4 (10.8) | -         | 4 (10.8) | 2 (4.4)   |
| Syncope                      | -       | -        | 4 (10.8) | -         | 4 (10.8) | 2 (4.4)   |
| Arthralgia                   | -       | -        | -        | -         | 4 (10.8) | 8 (17.8)  |
| Palpitations                 | -       | -        | -        | -         | 4 (10.8) | 7 (15.6)  |
| Hypokalaemia                 | -       | -        | -        | -         | 2 (5.4)  | 7 (15.6)  |
| Bronchitis                   | -       | -        | -        | -         | 4 (10.8) | 2 (4.4)   |
| Hypotension                  | -       | -        | -        | -         | -        | 5 (11.1)  |
| Pruritus                     | -       | -        | -        | -         | 4 (10.8) | -         |

\*Among the patients randomly assigned to the placebo group, two did not receive study treatment and were not included in the safety analysis set.

\*\*Adverse events are listed for those that occurred in more than 10% of the patients in any study group during the double-blind period and up to 7 days after placebo or selexipag was discontinued.

CTD: connective tissue disease; MCTD: mixed connective tissue disease; PAH: pulmonary arterial hypertension; SLE: systemic lupus erythematosus; SSc: systemic sclerosis.
